# Supplementary material for: Thermal Personalities of Older People in South Australia: A Personas-Based Approach to Develop Thermal Comfort Guidelines
Source: MDPI journal article supplement (doi:10.3390/ijerph17228402), 2020-11-13
Supplement: s1 [file s1]

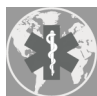

# Supplementary Materials: Thermal Personalities of Older People in South Australia: A Personas-Based Approach to Develop Thermal Comfort Guidelines

Helen Bennetts <sup>1,\*</sup>, Larissa Arakawa Martins <sup>1</sup>, Joost van Hoof <sup>2,3</sup> and Veronica Soebarto <sup>1</sup>

<sup>1</sup> School of Architecture and the Built Environment, The University of Adelaide, North Terrace, Adelaide, SA 5005, Australia; larissa.arakawamartins@adelaide.edu.au (L.A.M.); veronica.soebarto@adelaide.edu.au (V.S.)

<sup>2</sup> Faculty of Social Work & Education, The Hague University of Applied Sciences, Johanna Westerdijkplein 75, 2521 EN Den Haag, The Netherlands; j.vanhoof@hhs.nl

<sup>3</sup> Institute of Spatial Management, Faculty of Environmental Engineering and Geodesy, Wrocław University of Environmental and Life Sciences, ul. Grunwaldzka 55, 50-357 Wrocław, Poland

\* Correspondence: helen.bennetts@adelaide.edu.au; Tel.: +61-8-313-5836

**Table S1.** Results of cluster analysis.

| Clusters                                               | 1<br>(n=8) | 2<br>(n=38) | 3<br>(n=8) | 4<br>(n=99) | 5<br>(n=88) | 6<br>(n=62) | All<br>(n=303) |
|--------------------------------------------------------|------------|-------------|------------|-------------|-------------|-------------|----------------|
| <b>Age</b> ( $p = 0.000^*$ )                           |            |             |            |             |             |             |                |
| 65-74                                                  | 75%        | 16%         | 0%         | 45%         | 40%         | 34%         | 37%            |
| 75-84                                                  | 25%        | 45%         | 13%        | 35%         | 48%         | 45%         | 41%            |
| 85+                                                    | 0%         | 39%         | 88%        | 19%         | 13%         | 21%         | 21%            |
| <b>Sex</b> ( $p = 0.000$ )                             |            |             |            |             |             |             |                |
| Female                                                 | 88%        | 79%         | 75%        | 61%         | 85%         | 23%         | 63%            |
| Male                                                   | 13%        | 21%         | 25%        | 39%         | 15%         | 77%         | 37%            |
| <b>Living Arrangement</b> ( $p = 0.000$ )              |            |             |            |             |             |             |                |
| With partner/other                                     | 0%         | 3%          | 13%        | 78%         | 68%         | 66%         | 59%            |
| Alone                                                  | 100%       | 97%         | 88%        | 22%         | 32%         | 34%         | 41%            |
| <b>Household income</b> ( $p = 0.000$ )                |            |             |            |             |             |             |                |
| <AUD 30,000                                            | 38%        | 74%         | 63%        | 10%         | 22%         | 16%         | 25%            |
| AUD 30,000 – AUD 50,000                                | 13%        | 18%         | 38%        | 38%         | 43%         | 50%         | 39%            |
| >AUD 50,000                                            | 50%        | 8%          | 0%         | 52%         | 35%         | 34%         | 36%            |
| <b>Mobility</b> (walking about) ( $p = 0.001$ )        |            |             |            |             |             |             |                |
| No problem                                             | 0%         | 55%         | 38%        | 62%         | 51%         | 53%         | 54%            |
| Slight problem                                         | 38%        | 29%         | 25%        | 24%         | 27%         | 19%         | 25%            |
| Moderate problem                                       | 25%        | 16%         | 25%        | 11%         | 16%         | 24%         | 17%            |
| Severe problem                                         | 25%        | 0%          | 13%        | 3%          | 6%          | 2%          | 4%             |
| Unable to walk about                                   | 13%        | 0%          | 0%         | 0%          | 0%          | 2%          | 1%             |
| <b>Self-care</b> (wash and dress self) ( $p = 0.000$ ) |            |             |            |             |             |             |                |
| No problem                                             | 88%        | 95%         | 88%        | 93%         | 93%         | 95%         | 93%            |
| Slight problem                                         | 0%         | 3%          | 0%         | 7%          | 7%          | 3%          | 5%             |
| Moderate problem                                       | 0%         | 3%          | 0%         | 0%          | 0%          | 2%          | 1%             |
| Severe problem                                         | 0%         | 0%          | 13%        | 0%          | 0%          | 0%          | 0%             |
| Unable to wash or dress self                           | 13%        | 0%          | 0%         | 0%          | 0%          | 0%          | 0%             |
| <b>Usual activities</b> ( $p = 0.000$ )                |            |             |            |             |             |             |                |
| No problem                                             | 13%        | 74%         | 38%        | 74%         | 70%         | 74%         | 70%            |
| Slight problem                                         | 25%        | 21%         | 13%        | 17%         | 20%         | 13%         | 18%            |
| Moderate problem                                       | 50%        | 5%          | 38%        | 8%          | 8%          | 10%         | 10%            |
| Severe problem                                         | 0%         | 0%          | 13%        | 1%          | 1%          | 3%          | 2%             |
| Unable to undertake usual activities                   | 13%        | 0%          | 0%         | 0%          | 0%          | 0%          | 0%             |

|                                                                    |      |     |      |     |     |     |     |
|--------------------------------------------------------------------|------|-----|------|-----|-----|-----|-----|
| <b>Pain/discomfort (<math>p = 0.000</math>)</b>                    |      |     |      |     |     |     |     |
| No problem                                                         | 25%  | 26% | 38%  | 32% | 32% | 42% | 33% |
| Slight problem                                                     | 0%   | 50% | 38%  | 47% | 34% | 34% | 40% |
| Moderate problem                                                   | 38%  | 18% | 0%   | 17% | 30% | 24% | 22% |
| Severe problem                                                     | 38%  | 3%  | 25%  | 2%  | 2%  | 0%  | 3%  |
| Extreme problems                                                   | 0%   | 3%  | 0%   | 1%  | 2%  | 0%  | 1%  |
| <b>Anxiety/depression (<math>p = 0.000</math>)</b>                 |      |     |      |     |     |     |     |
| No problem                                                         | 38%  | 71% | 50%  | 77% | 60% | 79% | 70% |
| Slight problem                                                     | 0%   | 18% | 13%  | 16% | 31% | 18% | 20% |
| Moderate problem                                                   | 38%  | 11% | 38%  | 5%  | 8%  | 3%  | 8%  |
| Severe problem                                                     | 13%  | 0%  | 0%   | 2%  | 1%  | 0%  | 1%  |
| Extreme problems                                                   | 13%  | 0%  | 0%   | 0%  | 0%  | 0%  | 0%  |
| <b>Weather-related medical symptoms (<math>p = 0.046</math>)</b>   |      |     |      |     |     |     |     |
| 0                                                                  | 38%  | 66% | 25%  | 72% | 59% | 76% | 66% |
| 1                                                                  | 38%  | 26% | 25%  | 19% | 25% | 16% | 22% |
| 2                                                                  | 13%  | 8%  | 38%  | 8%  | 10% | 5%  | 9%  |
| 3                                                                  | 13%  | 0%  | 13%  | 1%  | 6%  | 3%  | 3%  |
| <b>First thing to keep cool (<math>p = 0.000</math>)</b>           |      |     |      |     |     |     |     |
| Personal strategies                                                | 0%   | 47% | 38%  | 33% | 20% | 18% | 27% |
| Household strategies                                               | 75%  | 24% | 0%   | 34% | 56% | 29% | 38% |
| Technology                                                         | 25%  | 29% | 63%  | 32% | 24% | 53% | 34% |
| <b>First thing to keep warm (<math>p = 0.000</math>)</b>           |      |     |      |     |     |     |     |
| Personal strategies                                                | 25%  | 68% | 63%  | 62% | 66% | 26% | 55% |
| Household strategies                                               | 25%  | 3%  | 13%  | 13% | 13% | 3%  | 10% |
| Technology                                                         | 50%  | 29% | 25%  | 25% | 22% | 71% | 35% |
| <b>Concern about heating/cooling cost (<math>p = 0.000</math>)</b> |      |     |      |     |     |     |     |
| Not at all concerned                                               | 13%  | 47% | 63%  | 15% | 23% | 42% | 28% |
| Concerned                                                          | 13%  | 42% | 25%  | 54% | 33% | 37% | 41% |
| Very or extremely concerned                                        | 75%  | 11% | 13%  | 31% | 44% | 21% | 31% |
| <b>Location (<math>p = 0.000</math>)</b>                           |      |     |      |     |     |     |     |
| Iron Triangle - semi arid (Bsk)                                    | 50%  | 21% | 13%  | 3%  | 16% | 23% | 15% |
| Adelaide - warm temperate (Csa)                                    | 50%  | 45% | 75%  | 58% | 18% | 26% | 38% |
| Fleurieu Peninsula or Adelaide Hills - mild temperate (Csb)        | 0%   | 34% | 13%  | 39% | 66% | 52% | 47% |
| <b>Age of house (<math>p = 0.014</math>)</b>                       |      |     |      |     |     |     |     |
| <10 years                                                          | 13%  | 5%  | 38%  | 10% | 11% | 2%  | 9%  |
| 11 to 20 years                                                     | 0%   | 11% | 13%  | 26% | 27% | 23% | 23% |
| >20 years                                                          | 88%  | 84% | 50%  | 64% | 61% | 76% | 68% |
| <b>Heating (<math>p = 0.000</math>)</b>                            |      |     |      |     |     |     |     |
| None                                                               | 38%  | 0%  | 0%   | 0%  | 0%  | 0%  | 1%  |
| Ducted RC**                                                        | 0%   | 8%  | 25%  | 87% | 3%  | 2%  | 31% |
| Split system RC                                                    | 25%  | 32% | 75%  | 2%  | 90% | 71% | 48% |
| Electric portable or panel                                         | 25%  | 13% | 0%   | 2%  | 2%  | 6%  | 5%  |
| Gas                                                                | 13%  | 29% | 0%   | 7%  | 0%  | 16% | 10% |
| Wood fire                                                          | 0%   | 18% | 0%   | 0%  | 3%  | 5%  | 4%  |
| Underfloor                                                         | 0%   | 0%  | 0%   | 2%  | 1%  | 0%  | 1%  |
| <b>Cooling (<math>p = 0.000</math>)</b>                            |      |     |      |     |     |     |     |
| None                                                               | 0%   | 26% | 0%   | 0%  | 0%  | 5%  | 4%  |
| Ducted RC                                                          | 13%  | 5%  | 25%  | 89% | 6%  | 10% | 34% |
| Split system RC                                                    | 13%  | 39% | 75%  | 3%  | 93% | 76% | 51% |
| Ducted evaporative                                                 | 50%  | 13% | 0%   | 8%  | 0%  | 6%  | 7%  |
| Window or portable                                                 | 25%  | 16% | 0%   | 0%  | 1%  | 3%  | 4%  |
| <b>In retirement village? (<math>p = 0.000</math>)</b>             |      |     |      |     |     |     |     |
| No                                                                 | 100% | 97% | 0%   | 94% | 76% | 94% | 87% |
| Yes                                                                | 0%   | 3%  | 100% | 6%  | 24% | 6%  | 13% |

\* Threshold of Pearson's Chi-Square ( $X^2$ ) test of significance considered as  $p < 0.05$

\*\* RC — reverse cycle air conditioner. In some countries, this is called a heat pump.
